# Supplementary material
Source: PubMed Central journal article supplement (PMC7963272)
Supplement: NIHMS1675454-supplement-1.pdf [file NIHMS1675454-supplement-1.pdf]

## 8.0 Supplemental Material

**Supplemental Table A:** Model specifications for each configuration modeled using CREO™ software.

The checkered model consists of 3.75m x 3.75m x 3.75m blocks of alternating hcp and bcc blocks. For each block, 125-micron thick rectangular cross-sections are put in the inside faces of the block (total of 4 for each), which combine with the other blocks in contact, which add to a 250-micron thick cross-section. The column layered model contains these thin rectangular cross-sections, which add up to 250-microns thick on the inside of the models and 125-microns thick on the outsides. This pattern is the same for the row layered model; 250-micron thick cross-sections on the insides and 125-micron thick cross-sections on the outside.

|                                      | <b>BCC</b> | <b>HCP</b> | <b>Row Layered</b> | <b>Column Layered</b> | <b>Checkered</b> | <b>BCC Inner HCP Outer</b> | <b>HCP Inner BCC Outer</b> |
|--------------------------------------|------------|------------|--------------------|-----------------------|------------------|----------------------------|----------------------------|
| HCP Strut diameter(mm)               | N/A        | 0.4        | 0.56               | 0.56                  | 0.46             | .592                       | .592                       |
| BCC Edge Strut Diameter(mm)          | 0.5*       | N/A        | 0.3                | 0.3                   | 0.25             | .362                       | .3626                      |
| BCC Diagonal Strut Diameter(mm)      | 0.7*       | N/A        | 0.42               | 0.42                  | 0.35             | 0.52                       | 0.52                       |
| Total Height(mm)                     | 15         | 18.37      | 16.4               | 15                    | 15               | 16.65                      | 16.65                      |
| Side Length(mm)                      | 7.5        | 4.33       | 7.5                | 7.5                   | 7.5              | 7.4                        | 7.4                        |
| Total HCP Unit Cells per layer/block | N/A        | 19         | 8                  | 20.3                  | 5.3              | 28.3                       | 4.3                        |
| Total BCC Unit Cells per layer/block | 9          | N/A        | 25                 | 50                    | 27               | 28                         | 116                        |
| Total HCP layers/blocks              | N/A        | 9          | 4                  | 2                     | 8                | 1                          | 1                          |
| Total BCC layers/blocks              | 6          | N/A        | 4                  | 2                     | 8                | 1                          | 1                          |
| Total HCP Unit Cells                 | N/A        | 171        | 32                 | 40.6                  | 42.4             | 28.3                       | 4.3                        |
| Total BCC Unit Cells                 | 54         | N/A        | 100                | 100                   | 216              | 28                         | 116                        |
